# Supplementary figures and images for: Repetitive Element-Mediated Recombination as a Mechanism for New Gene Origination in Drosophila
Source: PLOS journal article supplement (doi:10.1371/journal.pgen.0040003), 2008-01-16

## TE-association Simulation For Mean TFRs = 15 kb

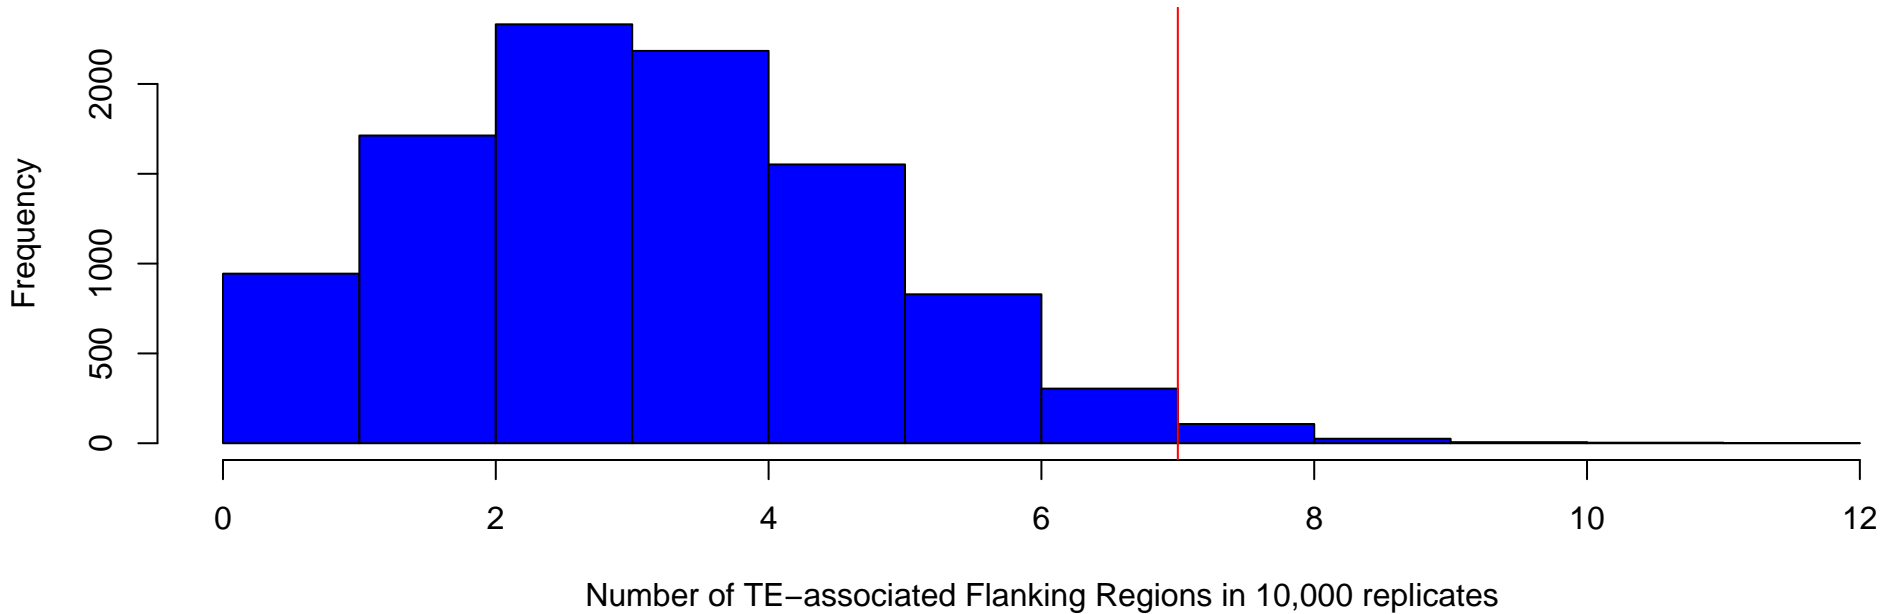

Supplement: S2 (10.1371/journal.pgen.0040003.s002) [file journal.pgen.0040003.sg002.pdf › journal.pgen.0040003.sg002.pdf]
